# Supplementary material for: Timely Resolution of SARS-CoV-2-Related Multi-System Inflammatory Syndrome in Children
Source: MDPI journal article supplement (doi:10.3390/v15010094), 2022-12-29
Supplement: s1 [file s1]

Supplemental Table 1. Laboratory Values

| Admission                  |     |                  | Minimum/Maximum     |     |                  | Discharge           |     |                  | 1-2 week Follow-up   |    |                  | 1-2 month Follow-up |    |                  | 6-8 month follow-up |    |                  |                     |
|----------------------------|-----|------------------|---------------------|-----|------------------|---------------------|-----|------------------|----------------------|----|------------------|---------------------|----|------------------|---------------------|----|------------------|---------------------|
|                            | n   | Percent abnormal | Median              | n   | Percent abnormal | Median              | n   | Percent abnormal | Median               | n  | Percent abnormal | Median              | n  | Percent abnormal | Median              | n  | Percent abnormal | Median              |
| Sodium (138-145 mmol/L)    |     |                  |                     |     |                  | MIN                 |     |                  |                      |    |                  |                     |    |                  |                     |    |                  |                     |
| ALL                        | 137 | 86.9%            | 134<br>(132-136)    | 136 | 98.5%            | 132<br>(130-134)    | 133 | 66.9%            | 137<br>(135-138)     | 98 | 52.0%            | 137<br>(136.3-139)  | 99 | 20.2%            | 139<br>(138-140)    | 54 | 11.1%            | 139<br>(138-141)    |
| Mild                       | 52  | 84.6%            | 134<br>(132-136)    | 51  | 96.1%            | 132<br>(130-135)    | 48  | 75.0%            | 136<br>(135-137.3)   | 34 | 58.8%            | 137<br>(136-139)    | 39 | 15.4%            | 139<br>(138-140)    | 20 | 10.0%            | 139.5<br>(138-141)  |
| Moderate                   | 44  | 90.9%            | 134<br>(132-136)    | 44  | 100.0%           | 133<br>(131-134)    | 44  | 70.5%            | 137<br>(135-138)     | 36 | 55.6%            | 137<br>(136-139)    | 33 | 33.3%            | 139<br>(137-140)    | 21 | 19.0%            | 139<br>(138-140)    |
| Severe                     | 41  | 85.4%            | 133<br>(130-135)    | 41  | 100.0%           | 131<br>(129-133)    | 41  | 53.7%            | 137<br>(136-138)     | 28 | 39.3%            | 139<br>(137-140)    | 27 | 11.1%            | 139<br>(138-140)    | 13 | 0.0%             | 140<br>(139-141)    |
| Creatinine (0.2-0.8 mg/dL) |     |                  |                     |     |                  | MAX                 |     |                  |                      |    |                  |                     |    |                  |                     |    |                  |                     |
| ALL                        | 137 | 34.3%            | 0.66<br>(0.47-0.9)  | 136 | 36.8%            | 0.69<br>(0.52-0.93) | 133 | 4.5%             | 0.42<br>(0.33-0.52)  | 98 | 4.1%             | 0.47<br>(0.35-0.59) | 99 | 5.1%             | 0.48<br>(0.39-0.59) | 54 | 13.0%            | 0.53<br>(0.41-0.66) |
| Mild                       | 52  | 7.7%             | 0.53<br>(0.4-0.67)  | 51  | 7.8%             | 0.54<br>(0.41-0.69) | 48  | 0.0%             | 0.38<br>(0.32-0.5)   | 34 | 0.0%             | 0.4<br>(0.3-0.54)   | 39 | 2.6%             | 0.49<br>(0.38-0.54) | 20 | 0.0%             | 0.46<br>(0.39-0.54) |
| Moderate                   | 44  | 38.6%            | 0.68<br>(0.5-0.9)   | 44  | 40.9%            | 0.69<br>(0.52-0.9)  | 44  | 4.5%             | 0.415<br>(0.34-0.54) | 36 | 2.8%             | 0.47<br>(0.36-0.64) | 33 | 6.1%             | 0.5<br>(0.41-0.64)  | 21 | 9.5%             | 0.57<br>(0.41-0.69) |
| Severe                     | 41  | 63.4%            | 0.9<br>(0.69-1.9)   | 41  | 68.3%            | 1.05<br>(0.71-2.3)  | 41  | 9.8%             | 0.45<br>(0.39-0.55)  | 28 | 10.7%            | 0.49<br>(0.4-0.56)  | 27 | 7.4%             | 0.46<br>(0.39-0.56) | 13 | 38.5%            | 0.6<br>(.41-0.87)   |
| Albumin (3.8-4.8 g/dL)     |     |                  |                     |     |                  | MIN                 |     |                  |                      |    |                  |                     |    |                  |                     |    |                  |                     |
| ALL                        | 137 | 76.6%            | 3.4<br>(2.9-3.7)    | 136 | 100.0%           | 2.5<br>(2.2-2.7)    | 133 | 97.0%            | 2.7<br>(2.6-3.1)     | 98 | 18.4%            | 3.9<br>(3.8-4.1)    | 99 | 3.0%             | 4.1<br>(4-4.3)      | 54 | 3.7%             | 4.3<br>(4.1-4.4)    |
| Mild                       | 52  | 63.5%            | 3.6<br>(3.2-3.9)    | 51  | 100.0%           | 2.6<br>(2.5-2.9)    | 48  | 95.8%            | 2.95<br>(2.7-3.1)    | 34 | 14.7%            | 3.9<br>(3.8-4.1)    | 39 | 2.6%             | 4.2<br>(4-4.3)      | 20 | 10.0%            | 4.2<br>(4.1-4.4)    |
| Moderate                   | 44  | 84.1%            | 3.4<br>(3.1-3.6)    | 44  | 100.0%           | 2.5<br>(2.3-2.6)    | 44  | 100.0%           | 2.7<br>(2.6-2.9)     | 36 | 13.9%            | 4<br>(3.9-4.1)      | 33 | 6.1%             | 4.1<br>(4-4.2)      | 21 | 0.0%             | 4.3<br>(4.1-4.4)    |
| Severe                     | 41  | 85.4%            | 2.9<br>(2.5-3.4)    | 41  | 100.0%           | 2.3<br>(2-2.5)      | 41  | 95.1%            | 2.6<br>(2.4-3.1)     | 28 | 28.6%            | 3.9<br>(3.7-4.2)    | 27 | 0.0%             | 4.1<br>(4-4.3)      | 13 | 0.0%             | 4.3<br>(4.1-4.4)    |
| AST (15-40 U/L)            |     |                  |                     |     |                  | MAX                 |     |                  |                      |    |                  |                     |    |                  |                     |    |                  |                     |
| ALL                        | 136 | 51.5%            | 41.5<br>(25-56.3)   | 133 | 60.9%            | 47<br>(31-70)       | 126 | 31.0%            | 31<br>(24.3-43.8)    | 97 | 11.3%            | 27<br>(21-35)       | 99 | 4.0%             | 24<br>(19-29.5)     | 54 | 0.0%             | 23<br>(18-26)       |
| Mild                       | 51  | 47.1%            | 31<br>(23-53.5)     | 50  | 50.0%            | 40<br>(29-58.3)     | 47  | 21.3%            | 27<br>(24-38.5)      | 34 | 5.9%             | 27<br>(21.5-35.8)   | 39 | 2.6%             | 24<br>(18-30)       | 20 | 0.0%             | 24.5<br>(19-27.5)   |
| Moderate                   | 44  | 52.3%            | 41<br>(30.8-55.3)   | 44  | 63.6%            | 46.5<br>(37.5-65.5) | 43  | 37.2%            | 34<br>(24.5-45)      | 36 | 13.9%            | 29.5<br>21-35.3)    | 33 | 0.0%             | 25<br>(19-30)       | 21 | 0.0%             | 23<br>(21-25)       |
| Severe                     | 41  | 56.1%            | 43<br>(31-72)       | 39  | 71.8%            | 54<br>(36.5-79.5)   | 36  | 36.1%            | 34.5<br>(26.8-50)    | 27 | 14.8%            | 26<br>(23-33)       | 27 | 11.1%            | 24<br>(21.5-27.5)   | 13 | 0.0%             | 17<br>(16-25)       |
| ALT (9-25 U/L)             |     |                  |                     |     |                  | MAX                 |     |                  |                      |    |                  |                     |    |                  |                     |    |                  |                     |
| ALL                        | 136 | 62.5%            | 32.8<br>(18.6-55.9) | 133 | 75.2%            | 41.3<br>(25.4-66.3) | 126 | 61.1%            | 32.8<br>(20.7-50)    | 97 | 62.9%            | 30.8<br>(21.1-46.4) | 99 | 17.2%            | 16.5<br>(12.9-20.4) | 54 | 13.0%            | 16.3<br>(12.2-19.3) |

|                                                |     |       |                        |     |                  |                                      |     |       |                        |    |       |                      |    |       |                     |    |       |                     |
|------------------------------------------------|-----|-------|------------------------|-----|------------------|--------------------------------------|-----|-------|------------------------|----|-------|----------------------|----|-------|---------------------|----|-------|---------------------|
| Mild                                           | 51  | 52.9% | 26.9<br>(13.7-52.9)    | 50  | 66.0%            | 34.4<br>(18.8-62.2)                  | 47  | 51.1% | 25.4<br>(15.6-36.3)    | 34 | 58.8% | 29<br>(20.3-39.1)    | 39 | 17.9% | 15.5<br>(11.8-19.7) | 20 | 20.0% | 17.2<br>(11.5-21.8) |
| Moderate                                       | 44  | 63.6% | 35.6<br>(20.5-53.8)    | 44  | 75.0%            | 47.7<br>(25.5-65.7)                  | 43  | 65.1% | 38.7<br>(23-50)        | 36 | 69.4% | 39.3<br>(23.3-52.4)  | 33 | 15.2% | 18.2<br>(13.9-20.7) | 21 | 4.8%  | 14.5<br>(12.6-18.2) |
| Severe                                         | 41  | 73.2% | 34.7<br>(24.9-62.6)    | 39  | 87.2%            | 44<br>(31.8-70.4)                    | 36  | 69.4% | 36.5<br>(22.5-61.9)    | 27 | 59.3% | 28<br>(18.2-59.7)    | 27 | 18.5% | 16<br>(12.9-21.3)   | 13 | 15.4% | 16.8<br>(13.5-20.2) |
| White Blood Cell count (4.0-11.0 x10^3/uL)     |     |       | MAX                    |     |                  |                                      |     |       |                        |    |       |                      |    |       |                     |    |       |                     |
| ALL                                            | 137 | 52.6% | 10.86<br>(7.84-14.53)  | 134 | 84.3%            | 18.04<br>(12.22-23.85)               | 134 | 73.9% | 14.54<br>(10.21-19.82) | 98 | 24.5% | 7.35<br>(6.0-10.93)  | 99 | 11.1% | 5.86<br>(4.7-7.42)  | 55 | 18.2% | 6.09<br>(4.63-7.71) |
| Mild                                           | 52  | 50.0% | 10.63<br>(7.45-14.12)  | 50  | 76.0%            | 14.46<br>(10.8-20.14)                | 50  | 64.0% | 12.31<br>(8.87-16.66)  | 33 | 27.3% | 7.76<br>(6.15-11.16) | 39 | 0.0%  | 6.69<br>(5.59-7.82) | 21 | 9.5%  | 6.19<br>(4.69-8.31) |
| Moderate                                       | 44  | 38.6% | 9.58<br>(7.39-11.95)   | 44  | 84.1%            | 17.69<br>(11.9-21.78)                | 43  | 72.1% | 14.69<br>(10.56-17.77) | 37 | 21.6% | 7.48<br>(6.01-10.79) | 33 | 18.2% | 5.16<br>(4.45-7.13) | 21 | 33.3% | 5.56<br>(3.94-6.61) |
| Severe                                         | 41  | 70.7% | 12.73<br>(10.08-16.56) | 40  | 95.0%            | 22.54<br>(18.31-32.08)               | 41  | 87.8% | 18.31<br>(13.23-27.54) | 28 | 25.0% | 6.79<br>(5.95-10.04) | 27 | 18.5% | 5.45<br>(4.22-6.43) | 13 | 7.7%  | 6.39<br>(4.8-7.9)   |
| Absolute Lymphocyte count (1.13-5.52 x10^3/uL) |     |       | MIN                    |     |                  |                                      |     |       |                        |    |       |                      |    |       |                     |    |       |                     |
| ALL                                            | 136 | 50.7% | 1.1<br>(0.76-1.7)      | 133 | 66.9%            | 0.86<br>(0.63-1.31)                  | 133 | 8.3%  | 2.51<br>(1.63-3.91)    | 98 | 6.1%  | 2.47<br>(1.92-3.45)  | 99 | 1.0%  | 2.41<br>(1.9-2.96)  | 55 | 0.0%  | 2.21<br>(1.95-2.85) |
| Mild                                           | 52  | 42.3% | 1.22<br>(0.88-2.04)    | 50  | 60.0%            | 0.98<br>(0.68-1.66)                  | 50  | 12.0% | 2.24<br>(1.53-3.69)    | 33 | 3.0%  | 3.05<br>(2.29-3.48)  | 39 | 2.6%  | 2.59<br>(2.18-3.18) | 21 | 0.0%  | 2.25<br>(2.15-3.09) |
| Moderate                                       | 44  | 54.5% | 1.05<br>(0.69-1.35)    | 43  | 74.4%            | 0.79<br>(0.59-1.13)                  | 42  | 7.1%  | 2.35<br>(1.66-3.43)    | 37 | 5.4%  | 2.5<br>(1.92-3.68)   | 33 | 0.0%  | 2.24<br>(1.81-2.84) | 21 | 0.0%  | 2.24<br>(1.91-2.81) |
| Severe                                         | 40  | 57.5% | 1.03<br>(0.69-1.62)    | 40  | 67.5%            | 0.86<br>(0.59-1.28)                  | 41  | 4.9%  | 2.78<br>(1.72-4.22)    | 28 | 10.7% | 2.26<br>(1.68-3.2)   | 27 | 0.0%  | 2.24<br>(1.85-2.78) | 13 | 0.0%  | 1.96<br>(1.8-2.29)  |
| Hemoglobin (10-13 g/dL)                        |     |       | MIN                    |     |                  |                                      |     |       |                        |    |       |                      |    |       |                     |    |       |                     |
| ALL                                            | 137 | 20.4% | 11.1<br>(10.1-12.2)    | 134 | 76.9%            | 9.0<br>(8.1-9.9)                     | 134 | 41.0% | 10.3<br>(9.2-11.1)     | 98 | 7.1%  | 11.7<br>(10.9-12.3)  | 99 | 1.0%  | 12.4<br>(11.8-12.8) | 55 | 0.0%  | 13<br>(12.3-13.8)   |
| Mild                                           | 52  | 17.3% | 11.5<br>(10.5-12.3)    | 50  | 62.0%            | 9.6<br>(8.4-10.4)                    | 50  | 42.0% | 10.3<br>(9.6-11)       | 33 | 6.1%  | 11.5<br>(10.9-12.2)  | 39 | 2.6%  | 12.2<br>(11.9-12.7) | 21 | 0.0%  | 13.1<br>(12.6-13.7) |
| Moderate                                       | 44  | 15.9% | 11.2<br>(10.5-12.2)    | 44  | 81.8%            | 9.2<br>(8.5-9.8)                     | 43  | 32.6% | 10.2<br>(9.7-11.3)     | 37 | 8.1%  | 11.9<br>(11.4-12.5)  | 33 | 0.0%  | 12.5<br>(12.3-12.8) | 21 | 0.0%  | 13<br>(12.2-14.1)   |
| Severe                                         | 41  | 29.3% | 10.4<br>(9.7-11.3)     | 40  | 90.0%            | 8.4<br>(7.6-9.1)                     | 41  | 48.8% | 10<br>(8.6-10.8)       | 28 | 7.1%  | 11.3<br>(10.6-11.9)  | 27 | 0.0%  | 12<br>(11-12.8)     | 13 | 0.0%  | 12.8<br>(12-13.1)   |
| Platelet count (140-440 x10^3/uL)              |     |       | MIN/MAX                |     | MIN/MAX          |                                      |     |       |                        |    |       |                      |    |       |                     |    |       |                     |
| ALL                                            | 137 | 33.6% | 186<br>(131-248)       | 134 | 39.6% /<br>41.8% | 174 / 372<br>(118-225) / (282-485)   | 134 | 41.8% | 356<br>(178-479)       | 98 | 39.8% | 400<br>(307-496)     | 99 | 16.2% | 349<br>(295-409)    | 55 | 7.3%  | 306<br>(266-377)    |
| Mild                                           | 52  | 28.8% | 228<br>(152-282)       | 50  | 40% / 50%        | 207 / 372.5<br>(120-254) / (257-484) | 50  | 50.0% | 371<br>(257-479)       | 33 | 39.4% | 396<br>(348-533)     | 39 | 15.4% | 365<br>(304-427)    | 21 | 14.3% | 303<br>(270-384)    |

|                           |     |        |                          |     |        |                         |     |        |                        |    |       |                       |    |       |                     |    |       |                     |
|---------------------------|-----|--------|--------------------------|-----|--------|-------------------------|-----|--------|------------------------|----|-------|-----------------------|----|-------|---------------------|----|-------|---------------------|
| ALL                       | 134 | 74.6%  | 235.7<br>(28.8-962.6)    | 118 | 95.8%  | 798.1<br>(270.8-1679.3) | 99  | 92.9%  | 248.6<br>(106.4-528.5) | 81 | 11.1% | 10<br>(10-17.3)       | 97 | 3.1%  | 10<br>(10-10)       | 54 | 7.4%  | 10<br>(10-14.6)     |
| Mild                      | 50  | 54.0%  | 35.9<br>(10-135.8)       | 39  | 89.7%  | 245.1<br>(121.5-780.9)  | 30  | 83.3%  | 175.8<br>(56.2-385.3)  | 23 | 8.7%  | 10<br>(10-15.3)       | 38 | 7.9%  | 10<br>(10-10.5)     | 21 | 14.3% | 10.6<br>(10-15.2)   |
| Moderate                  | 44  | 84.1%  | 311.4<br>(75.6-878.7)    | 41  | 100.0% | 644.7<br>(350.5-1207)   | 37  | 97.3%  | 232.3<br>(141.3-422.3) | 35 | 11.4% | 10<br>(10-19.6)       | 33 | 0.0%  | 10<br>(10-10)       | 21 | 4.8%  | 10<br>(10-11.3)     |
| Severe                    | 40  | 90.0%  | 1018.6<br>(274.7-2591.7) | 38  | 97.4%  | 1835.1<br>(999.2-3150)  | 32  | 96.9%  | 378.8<br>(150.7-782.2) | 23 | 13.0% | 13.4<br>(10-21.7)     | 26 | 0.0%  | 10<br>(10-10)       | 12 | 0.0%  | 10<br>(10-14.6)     |
| Troponin (<0.05 ng/mL)    |     |        | MAX                      |     |        |                         |     |        |                        |    |       |                       |    |       |                     |    |       |                     |
| ALL                       | 134 | 44.8%  | 0.03<br>(0.01-0.26)      | 97  | 67.0%  | 0.13<br>(0.03-0.49)     | 72  | 48.6%  | 0.05<br>(0.01-0.13)    | 60 | 6.7%  | 0.01<br>(0.01-0.01)   | 96 | 2.1%  | 0.01<br>(0.01-0.01) | 52 | 0.0%  | 0.01<br>(0.01-0.01) |
| Mild                      | 49  | 16.3%  | 0.01<br>(0.01-0.02)      | 31  | 38.7%  | 0.03<br>(0.01-0.25)     | 21  | 33.3%  | 0.01<br>(0.01-0.06)    | 14 | 0.0%  | 0.01<br>(0.01-0.01)   | 37 | 2.7%  | 0.01<br>(0.01-0.01) | 20 | 0.0%  | 0.01<br>(0.01-0.01) |
| Moderate                  | 44  | 47.7%  | 0.05<br>(0.01-0.18)      | 31  | 71.0%  | 0.11<br>(0.05-0.26)     | 27  | 37.0%  | 0.04<br>(0.02-0.09)    | 29 | 6.9%  | 0.01<br>(0.01-0.01)   | 32 | 3.1%  | 0.01<br>(0.01-0.01) | 20 | 0.0%  | 0.01<br>(0.01-0.01) |
| Severe                    | 41  | 75.6%  | 0.28<br>(0.07-0.61)      | 35  | 88.6%  | 0.38<br>(0.14-1.02)     | 24  | 75.0%  | 0.18<br>(0.06-0.47)    | 17 | 11.8% | 0.01<br>(0.01-0.02)   | 27 | 0.0%  | 0.01<br>(0.01-0.01) | 12 | 0.0%  | 0.01<br>(0.01-0.01) |
| CRP (0.0-0.5 mg/dL)       |     |        | MAX                      |     |        |                         |     |        |                        |    |       |                       |    |       |                     |    |       |                     |
| ALL                       | 137 | 100.0% | 17.2<br>(12.4-23.5)      | 135 | 100.0% | 20.3<br>(14.5-24.8)     | 134 | 98.5%  | 3.9<br>(2.5-7.6)       | 97 | 11.3% | 0.1<br>(0.1-0.3)      | 97 | 12.4% | 0.1<br>(0-0.2)      | 54 | 13.0% | 0.1<br>(0-0.2)      |
| Mild                      | 52  | 100.0% | 15.6<br>(11.3-19.5)      | 51  | 100.0% | 18.2<br>(11.6-22.4)     | 50  | 98.0%  | 4.3<br>(3.1-9.8)       | 33 | 15.2% | 0.1<br>(0.1-0.3)      | 38 | 15.8% | 0.1<br>(0-0.2)      | 21 | 14.3% | 0.1<br>(0-0.2)      |
| Moderate                  | 44  | 100.0% | 17.14<br>(12.3-23.1)     | 44  | 100.0% | 20.2<br>(14.7-25.0)     | 44  | 97.7%  | 4.4<br>(2.5-7.6)       | 37 | 13.5% | 0.1<br>(0.1-0.2)      | 32 | 15.6% | 0<br>(0-0.1)        | 21 | 4.8%  | 0.1<br>(0-0.1)      |
| Severe                    | 41  | 100.0% | 22.4<br>(14.9-26.4)      | 40  | 100.0% | 23.8<br>(18.6-28.7)     | 40  | 100.0% | 3.0<br>(1.6-5.3)       | 27 | 3.7%  | 0.1<br>(0.1-0.2)      | 27 | 3.7%  | 0<br>(0-0.1)        | 12 | 25.0% | 0.2<br>(0-0.5)      |
| ESR (0-15 mm/hr)          |     |        |                          |     |        |                         |     |        |                        |    |       |                       |    |       |                     |    |       |                     |
| ALL                       | 121 | 98.3%  | 51<br>(37-70)            | -   | -      | -                       | -   | -      | -                      | 59 | 83.1% | 30<br>(19-56)         | 97 | 44.3% | 13<br>(9-23)        | 53 | 11.3% | 8<br>(7-12)         |
| Mild                      | 45  | 97.8%  | 47<br>(32-62)            | -   | -      | -                       | -   | -      | -                      | 17 | 88.2% | 28<br>(20-65)         | 37 | 54.1% | 17<br>(11-25)       | 20 | 5.0%  | 8<br>(7-10)         |
| Moderate                  | 39  | 97.4%  | 48<br>(40-70)            | -   | -      | -                       | -   | -      | -                      | 25 | 80.0% | 34<br>(19-47)         | 33 | 33.3% | 12<br>(8-18)        | 21 | 4.8%  | 8<br>(6-9)          |
| Severe                    | 37  | 100.0% | 58<br>(45-76)            | -   | -      | -                       | -   | -      | -                      | 17 | 82.4% | 29<br>(21-46)         | 27 | 44.4% | 12<br>(10-28)       | 12 | 33.3% | 13<br>(7-16)        |
| Ferritin (5.3-99.9 ng/mL) |     |        | MAX                      |     |        |                         |     |        |                        |    |       |                       |    |       |                     |    |       |                     |
| ALL                       | 134 | 97.0%  | 527.4<br>(297.8-868.1)   | 133 | 100.0% | 693<br>(416.4-1344.6)   | 127 | 100.0% | 438.7<br>(270.5-719.4) | 93 | 68.8% | 143.7<br>(82-223)     | 97 | 10.3% | 40.2<br>(25.5-63)   | 54 | 1.9%  | 25.1<br>(20.1-37.8) |
| Mild                      | 51  | 94.1%  | 365.6<br>(205.6-635.4)   | 49  | 100.0% | 603.7<br>(318.4-851.9)  | 46  | 100.0% | 450.8<br>(239.5-728.4) | 31 | 67.7% | 138.5<br>(68.4-211.2) | 39 | 7.7%  | 37.9<br>(24.9-64.6) | 21 | 0.0%  | 25.9<br>(22.7-41.3) |
| Moderate                  | 43  | 97.7%  | 472.4<br>(322.5-852.1)   | 44  | 100.0% | 615.3<br>(459.6-1064)   | 43  | 100.0% | 399.7<br>(268.5-556.4) | 36 | 63.9% | 144.7<br>(81.7-234.0) | 33 | 9.1%  | 37.8<br>(28.3-64.7) | 21 | 0.0%  | 24.3<br>(21.5-36.4) |

|                            |     |        |                         |    |        |                        |    |        |                        |    |       |                        |    |       |                     |    |       |                     |
|----------------------------|-----|--------|-------------------------|----|--------|------------------------|----|--------|------------------------|----|-------|------------------------|----|-------|---------------------|----|-------|---------------------|
| Severe                     | 40  | 100.0% | 814.8<br>(549.3-1823.2) | 40 | 100.0% | 1139<br>(665.1-2452.3) | 38 | 100.0% | 508.6<br>(376.8-789.2) | 26 | 76.9% | 141.7<br>(106.4-238.3) | 25 | 16.0% | 40.7<br>(28.3-61.5) | 12 | 8.3%  | 26.8<br>(16.1-37.8) |
| Fibrinogen (156-400 mg/dL) |     |        | MAX                     |    |        |                        |    |        |                        |    |       |                        |    |       |                     |    |       |                     |
| ALL                        | 128 | 87.5%  | 554<br>(462-673)        | 95 | 87.4%  | 591<br>(450-705)       | 77 | 48.1%  | 390<br>(298-517)       | 61 | 8.2%  | 292<br>(253-322)       | 67 | 11.9% | 321<br>(285-361)    | 52 | 11.5% | 289<br>(256-350)    |
| Mild                       | 49  | 91.8%  | 544<br>(450-652)        | 36 | 91.7%  | 594<br>(440-687)       | 29 | 65.5%  | 414<br>(368-538)       | 15 | 13.3% | 287<br>(255-320)       | 27 | 18.5% | 348<br>(283-384)    | 20 | 5.0%  | 274<br>(249-337)    |
| Moderate                   | 43  | 83.7%  | 566<br>(460-666)        | 33 | 81.8%  | 566<br>(477-673)       | 27 | 48.1%  | 361<br>(282-505)       | 29 | 6.9%  | 308<br>(271-327)       | 23 | 13.0% | 311<br>(283-349)    | 20 | 10.0% | 303<br>(268-336)    |
| Severe                     | 36  | 86.1%  | 596<br>(470-687)        | 26 | 88.5%  | 582<br>(479-774)       | 21 | 23.8%  | 320<br>(253-390)       | 17 | 5.9%  | 279<br>(240-301)       | 17 | 0.0%  | 307<br>(291-350)    | 12 | 25.0% | 322<br>(262-396)    |
| D-Dimer DDU (<251 ng/mL)   |     |        | MAX                     |    |        |                        |    |        |                        |    |       |                        |    |       |                     |    |       |                     |
| ALL                        | 122 | 98.4%  | 1585<br>(924-2191)      | 93 | 100.0% | 1915<br>(1295-3145)    | 82 | 100.0% | 1330<br>(890-1743)     | 75 | 48.0% | 245<br>(175-415)       | 93 | 16.1% | 155<br>(135-220)    | 52 | 9.6%  | 135<br>(135-160)    |
| Mild                       | 41  | 97.6%  | 1170<br>(635-1820)      | 31 | 100.0% | 1595<br>(1005-2055)    | 30 | 100.0% | 1018<br>(694-1559)     | 22 | 50.0% | 245<br>(151-514)       | 35 | 11.4% | 145<br>(135-190)    | 19 | 5.3%  | 135<br>(135-150)    |
| Moderate                   | 43  | 97.7%  | 1870<br>(1095-2438)     | 35 | 100.0% | 1915<br>(1358-3220)    | 32 | 100.0% | 1423<br>(1039-3259)    | 34 | 52.9% | 263<br>(190-423)       | 33 | 24.2% | 170<br>(135-240)    | 21 | 19.0% | 145<br>(135-195)    |
| Severe                     | 38  | 100.0% | 1743<br>(1355-2241)     | 27 | 100.0% | 2330<br>(1883-4550)    | 20 | 100.0% | 1475<br>(985-1800)     | 19 | 36.8% | 225<br>(163-303)       | 25 | 12.0% | 165<br>(135-210)    | 12 | 0.0%  | 135<br>(135-138)    |

Abbreviations: aspartate aminotransferase – AST; alanine transaminase – ALT; white blood cell count – WBC; absolute lymphocyte count – ALC; hemoglobin – Hgb; brain natriuretic peptide – BNP; C-reactive protein – CRP; erythrocyte sedimentation rate – ESR
